# Supplementary material
Source: Springer Nature journal article supplement (https://www.springermedizin.de/resource/supplementary/12885_2010_2669_MOESM6_ESM.pdf/9461696)

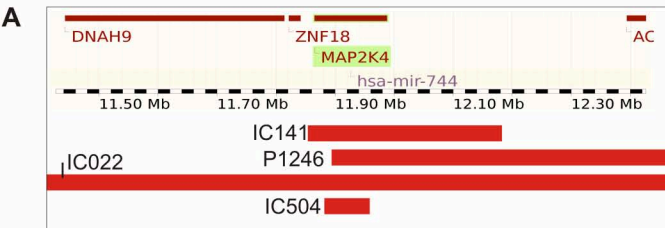

**B** Normalised and Temp-Shifted Difference Plot

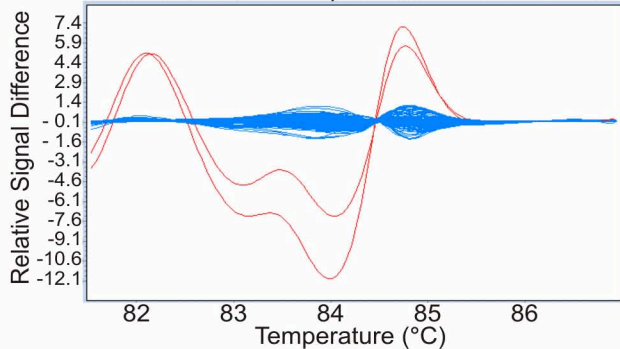

**C**

IC489N

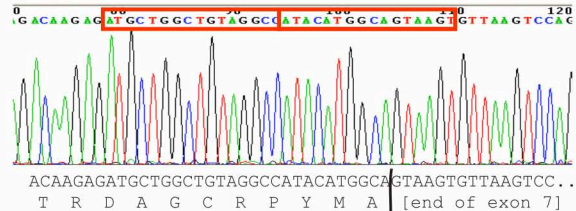

IC489T

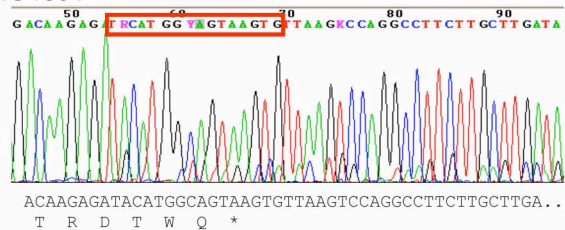

Supplement: MOESM6 [file 9461696]
